# Supplementary material for: Carbon-Encapsulated Iron Nanoparticles as a Magnetic Modifier of Bioanode and Biocathode in a Biofuel Cell and Biobattery
Source: MDPI journal article supplement (doi:10.3390/catal11060705), 2021-06-02
Supplement: s1 [file s1]

Archive with 1 entries (1 files):
- 20210604 catalysts-1234904 SM.pdf
